# Supplementary material for: Det moderna goda boendet - Effektivisering av bostaden med fokus på att skapa ett integrationsökande koncept för bostadsområden
Source: eLife journal article supplement (doi:10.7554/elife.67185), 2012-01-01
Supplement: supp [file elife-67185-supp-v1.zip]

Archive with 3 entries (3 files):
- elife_poa_e67185_Transparent_Reporting_File.pdf
- elife_poa_e67185_Figure_2_figure_supplement_1.pdf
- elife_poa_e67185_Figure_3_figure_supplement_1.pdf
