# Supplementary figures and images for: Det moderna goda boendet - Effektivisering av bostaden med fokus på att skapa ett integrationsökande koncept för bostadsområden
Source: eLife journal article supplement (doi:10.7554/elife.67185), 2012-01-01

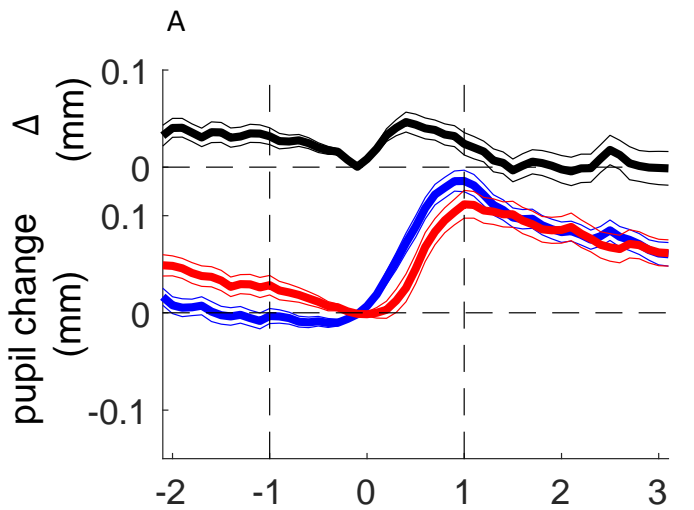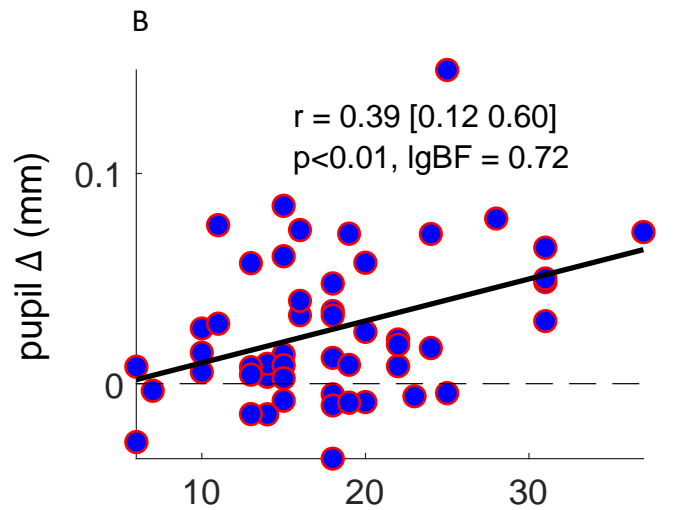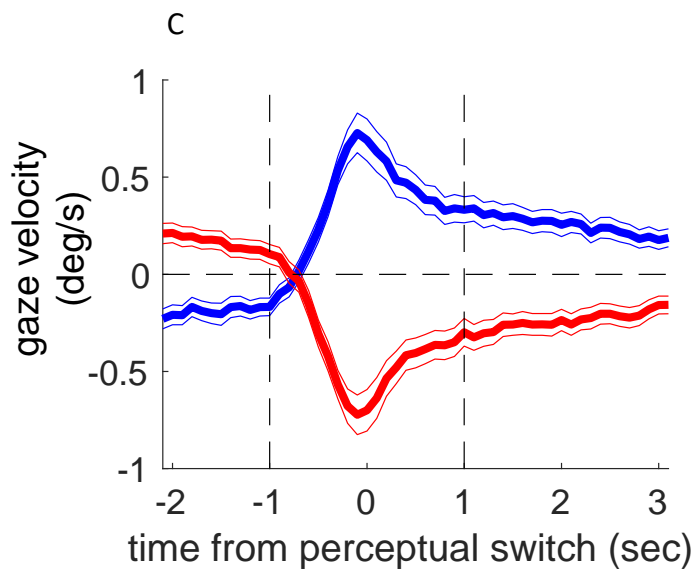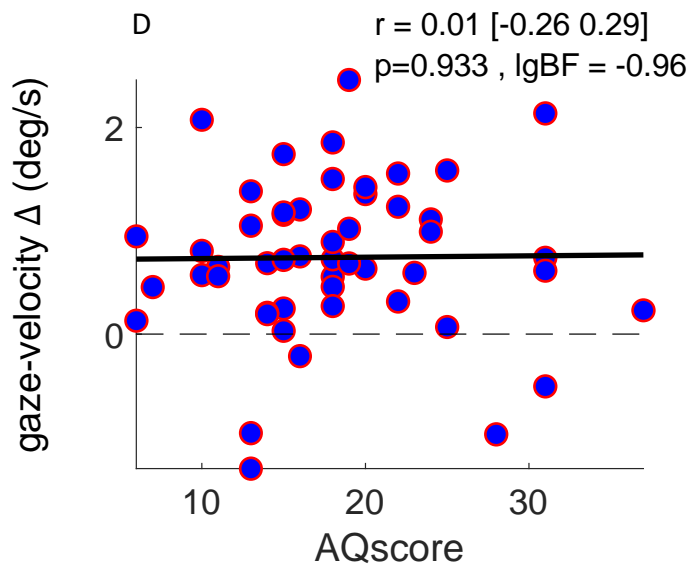

Supplement: supp [file elife-67185-supp-v1.zip › elife_poa_e67185_Figure_2_figure_supplement_1.pdf]

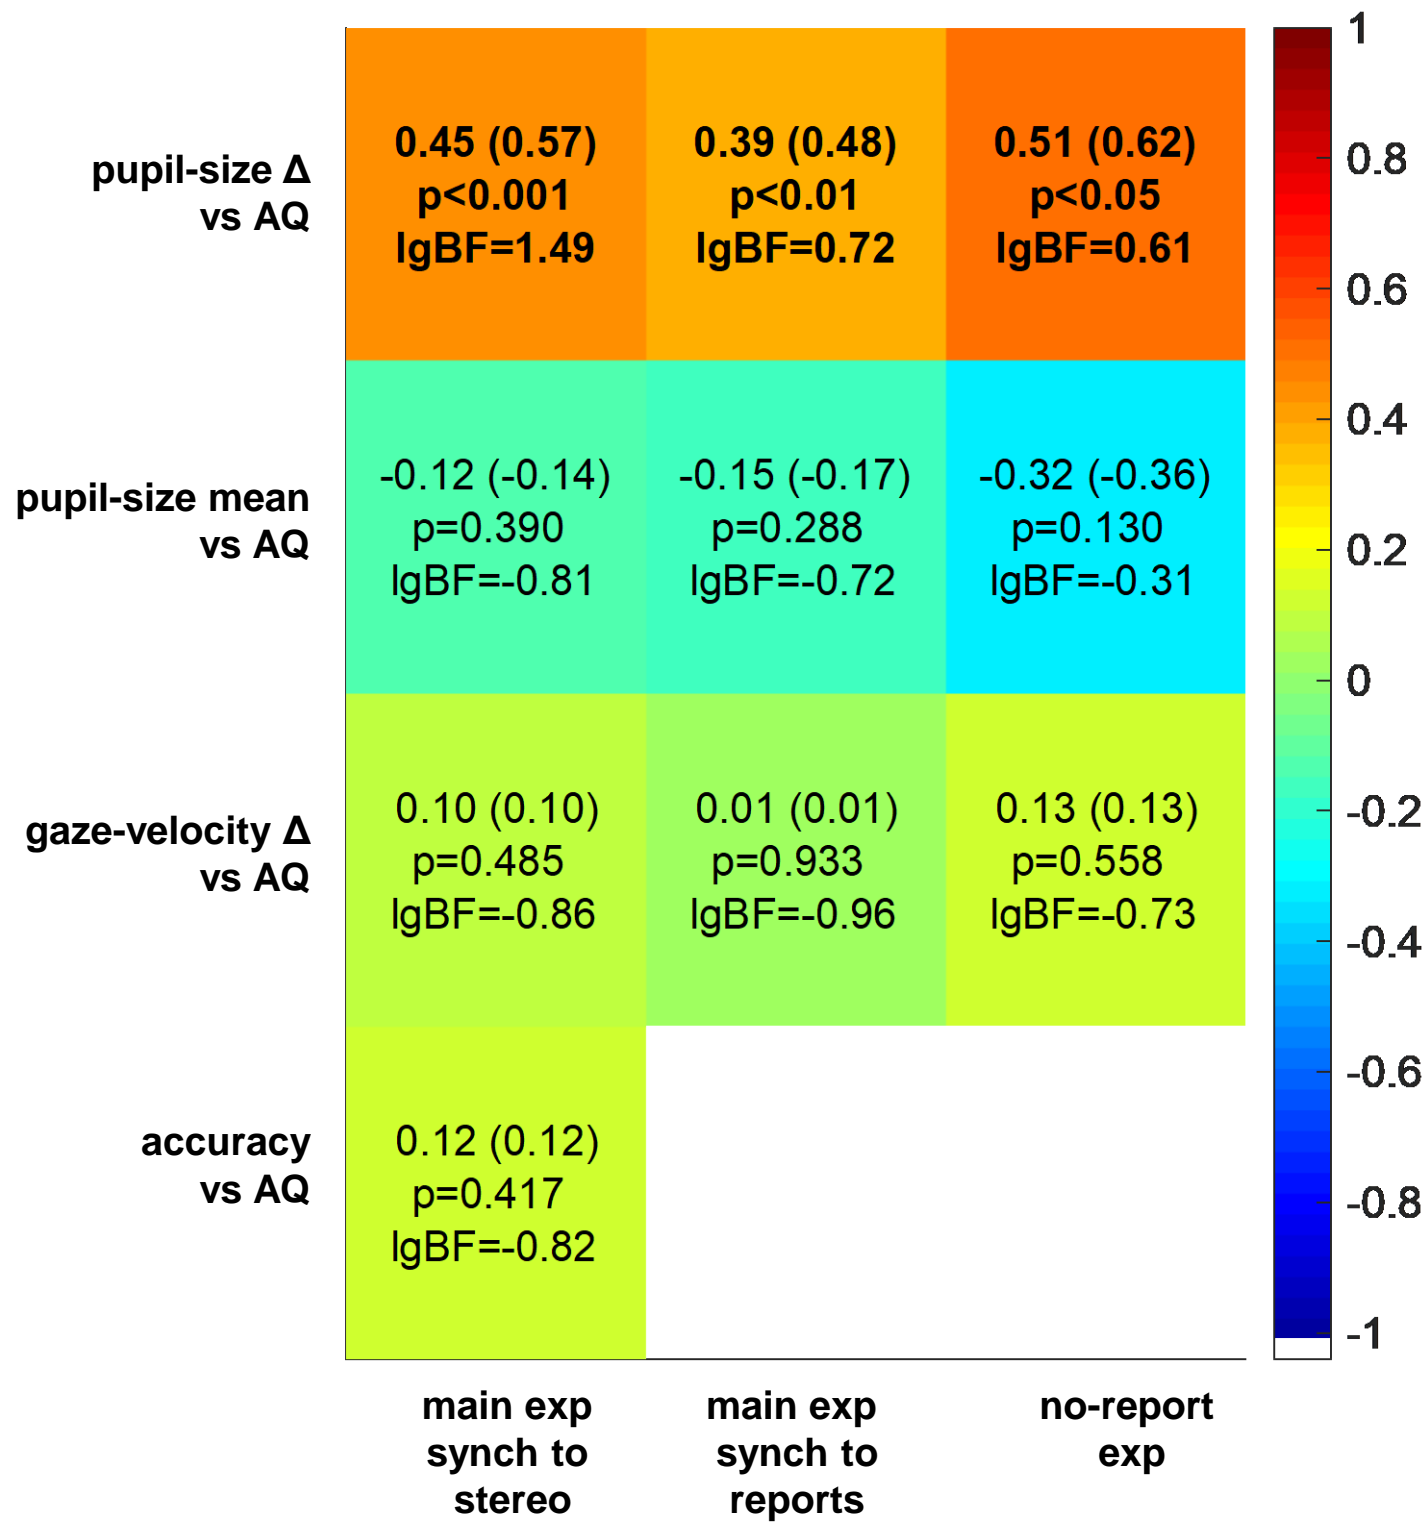

Supplement: supp [file elife-67185-supp-v1.zip › elife_poa_e67185_Figure_3_figure_supplement_1.pdf]
